# Supplementary material for: Bioavailable Microbial Metabolites of Flavanols Demonstrate Highly Individualized Bioactivity on In Vitro β-Cell Functions Critical for Metabolic Health
Source: MDPI journal article supplement (doi:10.3390/metabo13070801), 2023-06-28
Supplement: s1 [file s1]

## Supplementary

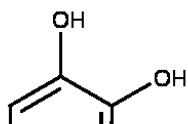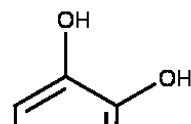

(+)-catechin

(-)-epicatechin

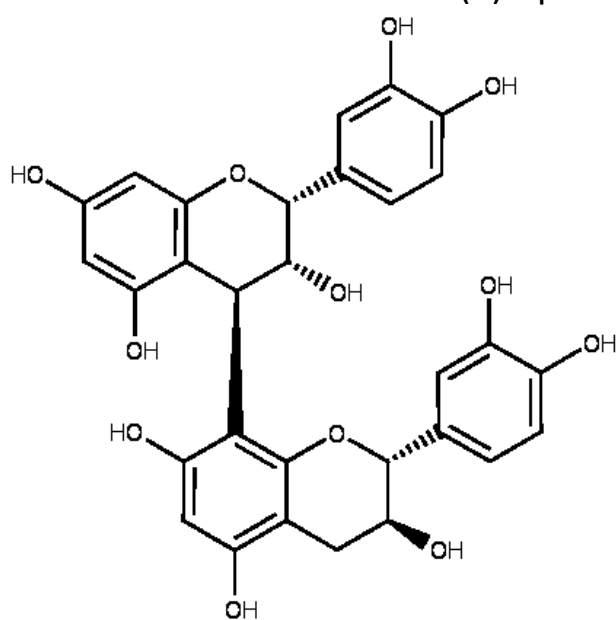

procyanidin B2

### *Supplemental Figure S1 Dietary Flavanol Structures*

Structures of flavanols commonly found in the human diet from sources such as cocoa, tea, fruits, etc.

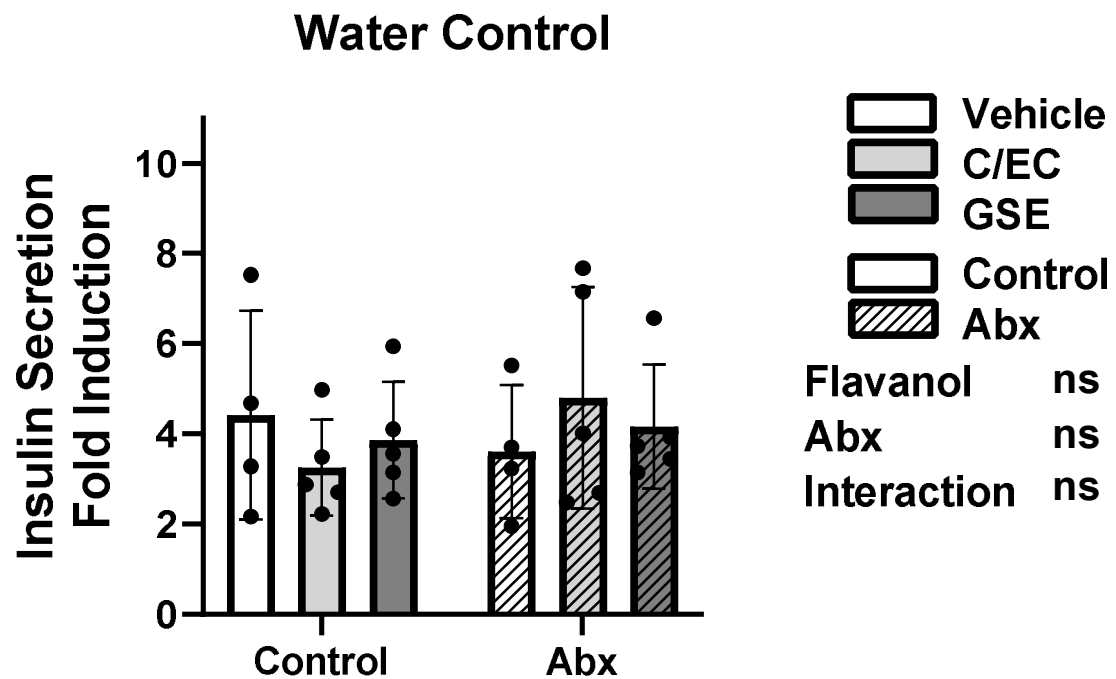

*Supplemental Figure S2 Insulin Secretion Fold of Water Controls.*

Insulin secretion fold induction difference between high and low glucose stimulation results of INS-1 832-13  $\beta$ -cells following 24-hour culture with 10% water controls for comparison with results in Figure 3 for urine metabolites from rats fed the vehicle (white bars), catechin/epicatechin (C/EC) (light gray bars), or grape seed extract (GSE) (dark gray bars) and treated with (striped bars) or without antibiotics (Abx) (solid bars). Data represent the average of 3  $\beta$ -cell culture triplicates for each animal ( $n=4-5$  animals). \*Represent 1-way ANOVA with Dunnett's post hoc test results show flavanol effects, Abx effects, interaction effects, and significance compared to the vehicle control. Not significant (ns).

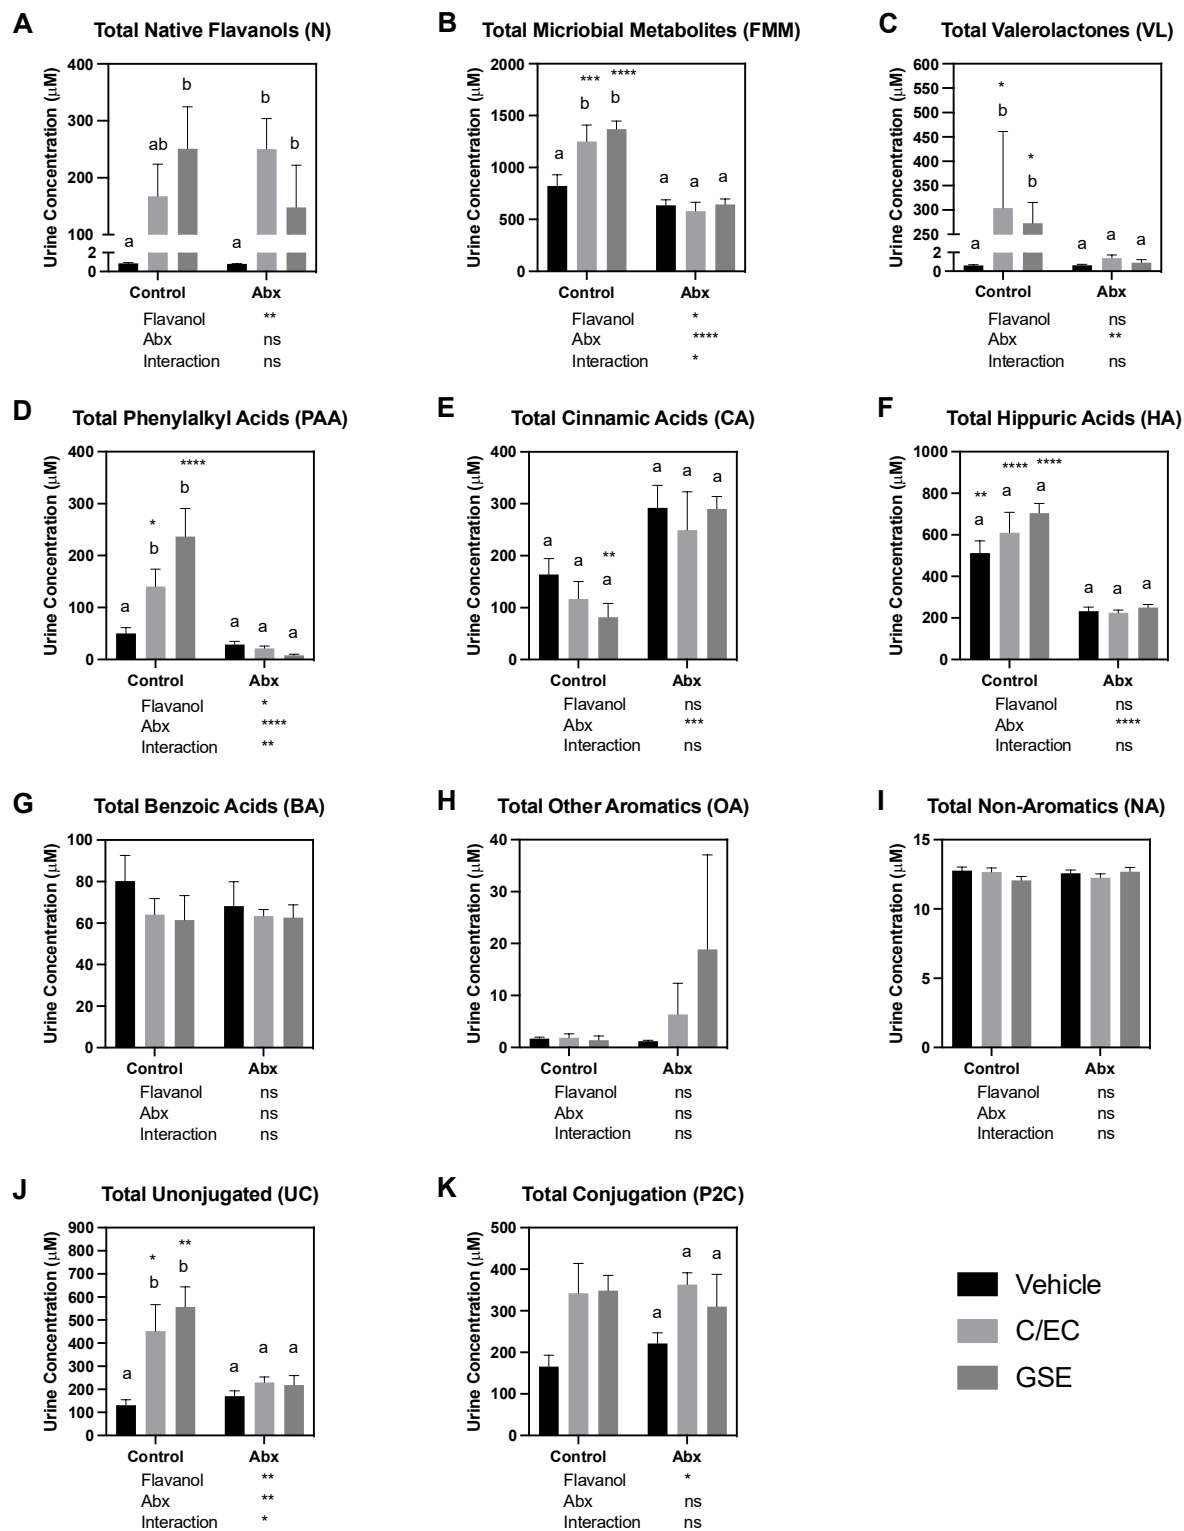

**Supplementary Figure S3.** Concentrations of total levels of native flavanols, flavanol microbial metabolites, and their phase-II conjugates in urine samples. Values are presented as mean  $\pm$  SEM. For each measure, 2-way ANOVA was performed to determine the statistical significance

of main effects (flavanol and Abx treatment) and interactions. Values below each graph indicate the results of 2-way ANOVA. If a significant main effect or interaction was detected, Holm-Sidak post hoc tests to account for multiple comparisons were performed to determine differences among the 3 flavanol treatments within each antibiotic treatment group (Control and Abx); bars not sharing a common superscript letter within each group are statistically different. Holm-Sidak post hoc tests were also performed to determine differences between antibiotic treatments (Control and Abx) for each flavanol; asterisks indicate a significant difference for that flavanol between Control and Abx (\* $P < 0.05$ , \*\* $P < 0.01$ , \*\*\* $P < 0.001$ , \*\*\*\* $P < 0.0001$ ). The overall family-wise error rate was set as 0.05, with one family per group. This figure originally appeared as Figure 2 in Griffin LE, SE Kohrt, A Rathore, CD Kay, MM Grabowska, AP Neilson, Microbial metabolites of flavanols in urine are associated with enhanced anti-proliferative activity in bladder cancer cells *in vitro*, *Nutr Cancer* 2021; 74(1):194-210. <https://doi.org/10.1080/01635581.2020.1869277>. PMID: 33522303 (<https://pubmed.ncbi.nlm.nih.gov/33522303/>). Preprint (bioRxiv) DOI: <https://doi.org/10.1101/2020.09.22.308056>. See [www.tandfonline.com](http://www.tandfonline.com). Reproduced with permission of Taylor & Francis Ltd. Permission granted 12 Oct 2022. Abbreviations: V: vehicle, Abx: antibiotics, C/EC: catechin/epicatechin, GSE: great seed extract

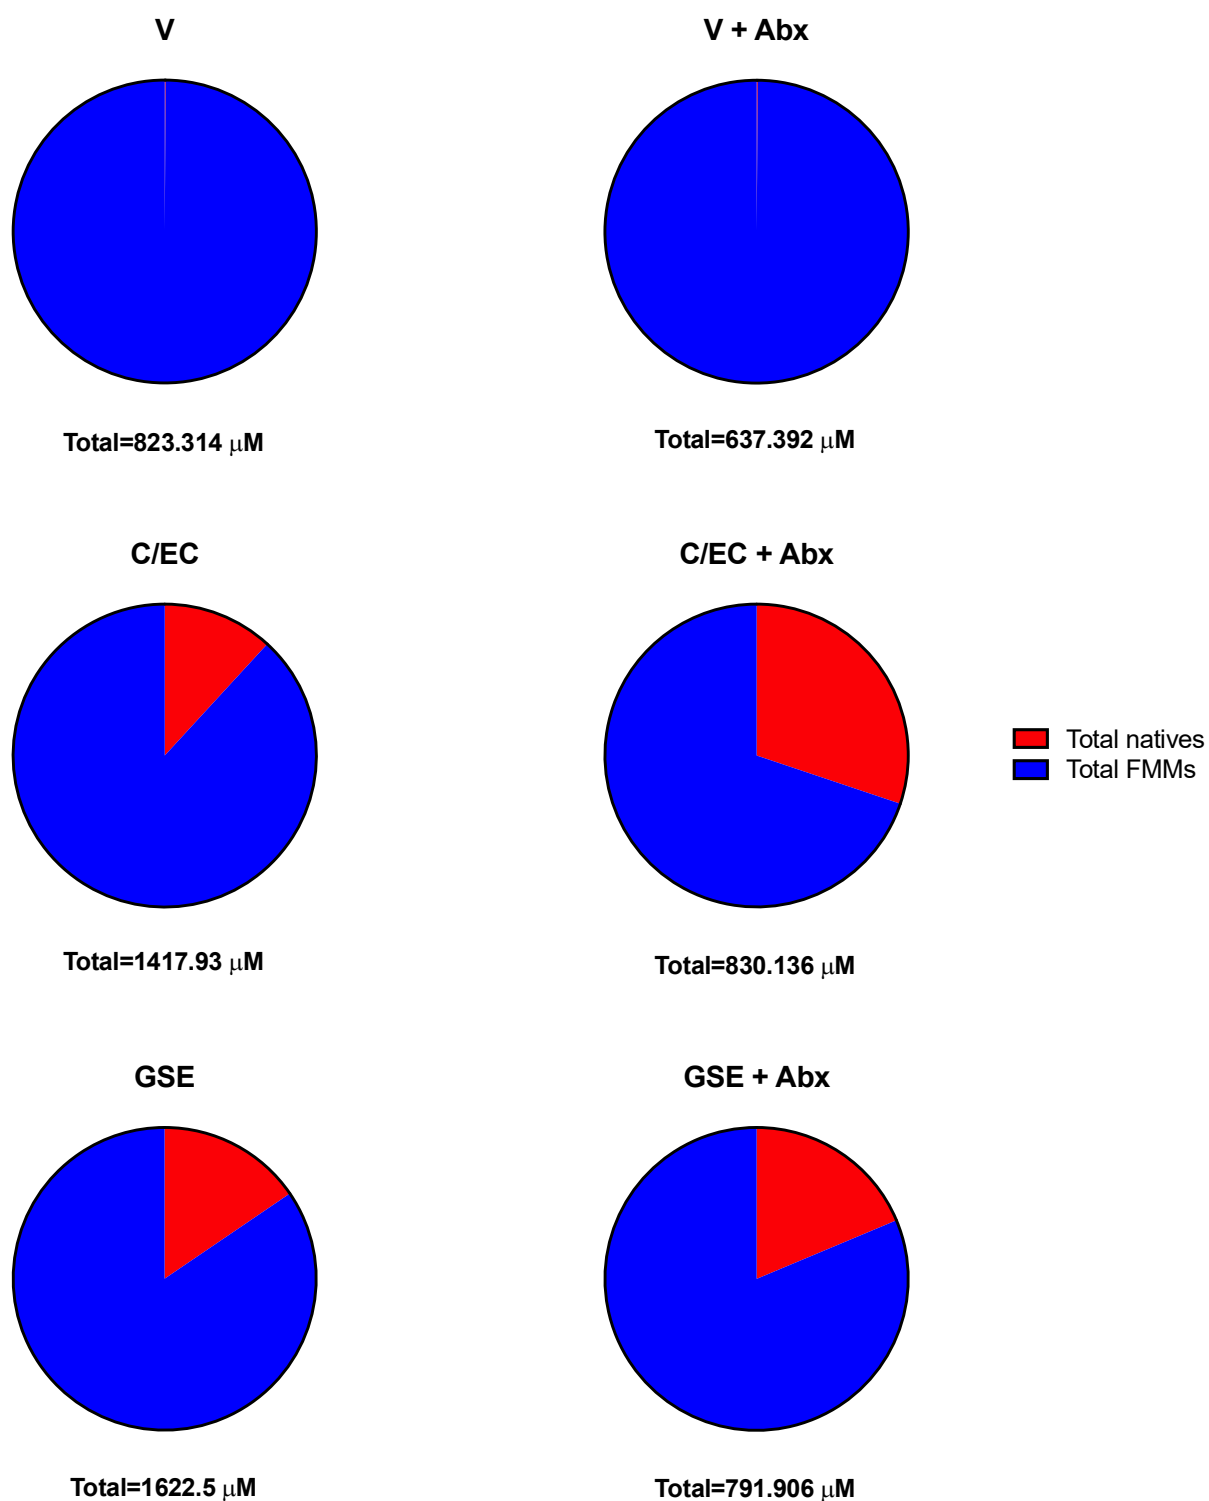

**Supplementary Figure S4.** Pie charts showing the mean distribution (fraction of total, pie charts) and total sum of native flavanols and flavanol microbial metabolites (FMMs) in urine from the six treatment groups. Abbreviations: V: vehicle, Abx: antibiotics, C/EC: catechin/epicatechin, GSE: great seed extract.

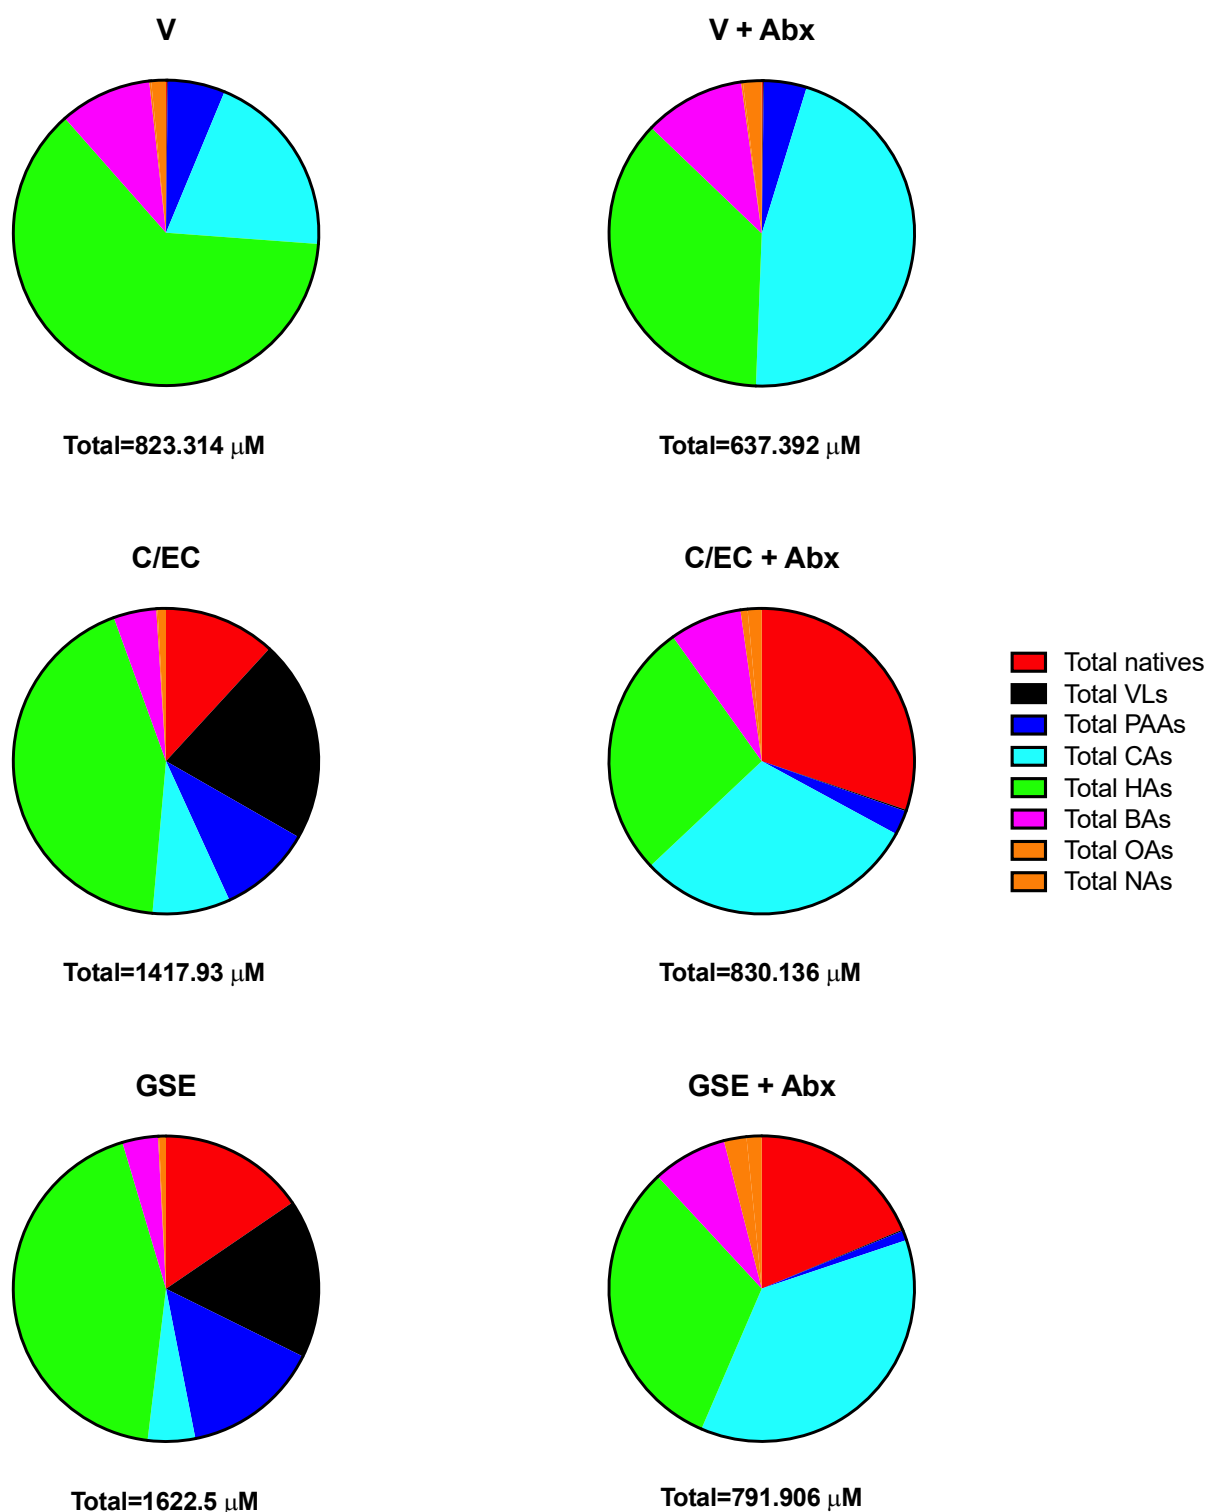

**Supplementary Figure S5.** Pie charts showing the mean distribution (fraction of total) by compound class compounds and total measured compounds in urine from the six treatment groups. Abbreviations: V: vehicle, Abx: antibiotics, C/EC: catechin/epicatechin, GSE: great seed extract

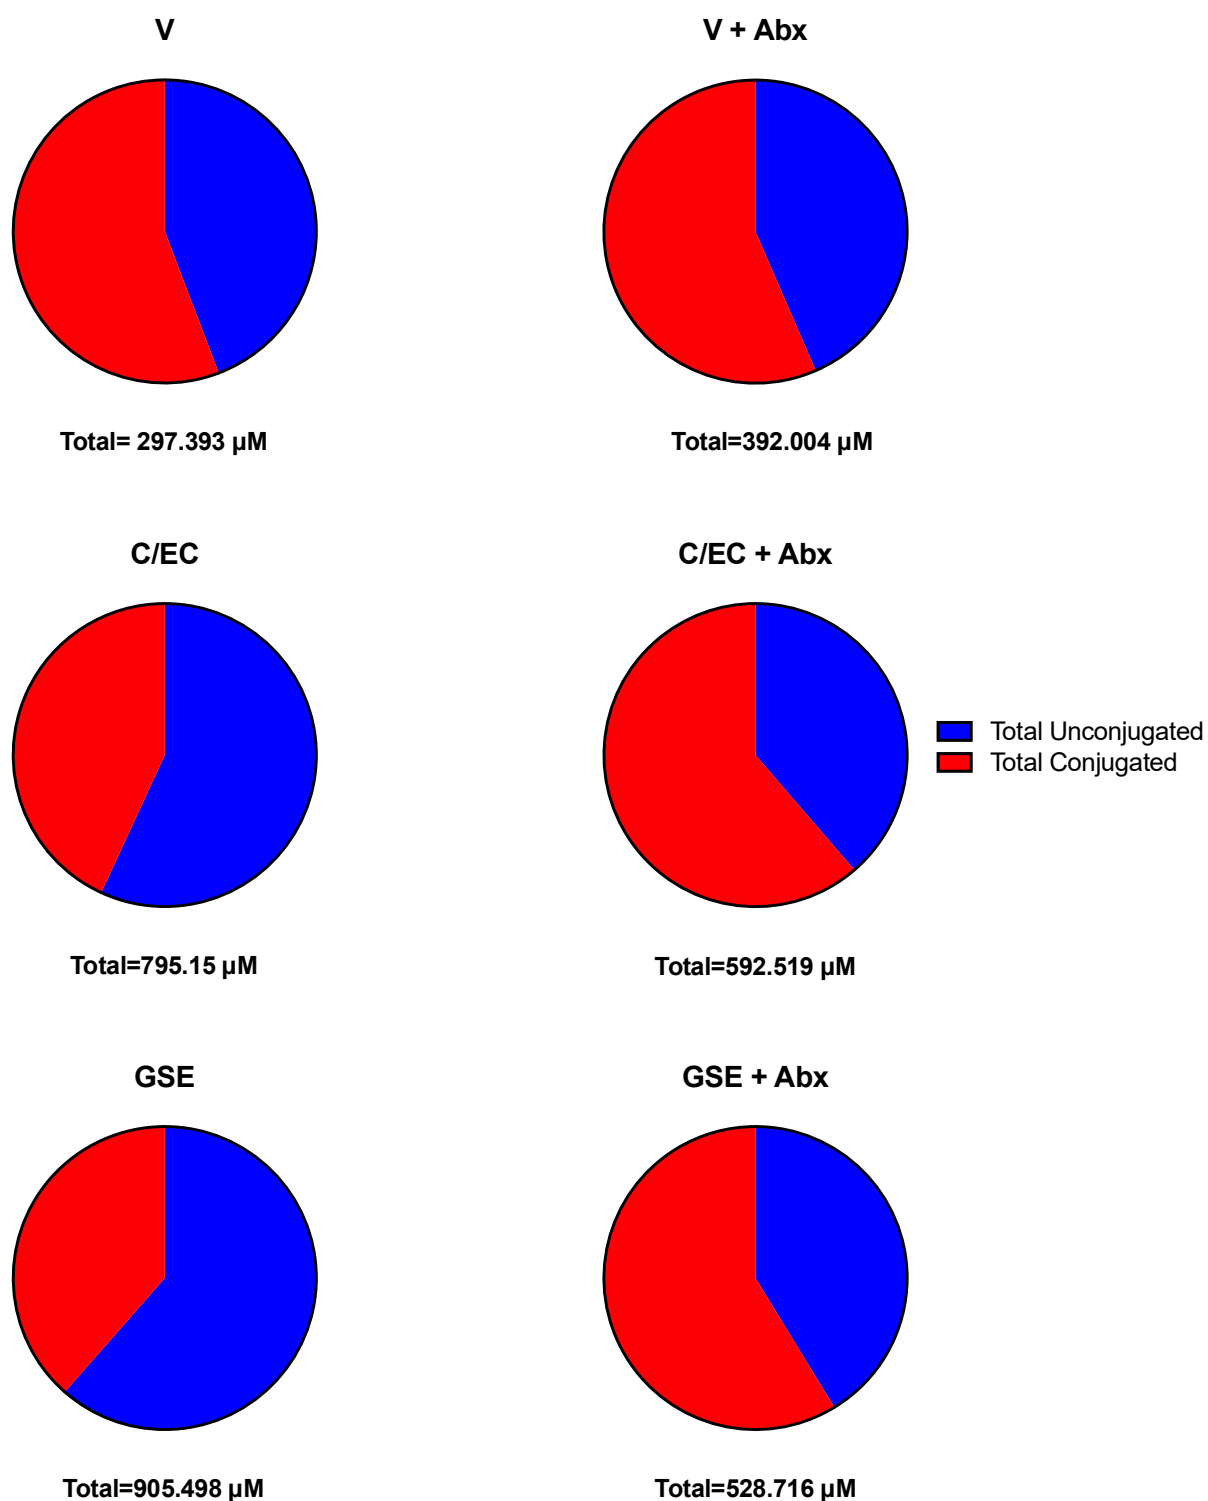

**Supplementary Figure S6.** Pie charts showing the mean distribution (fraction of total) by phase-II conjugation and total measured compounds in urine from the six treatment groups. Abbreviations: V: vehicle, Abx: antibiotics, C/EC: catechin/epicatechin, GSE: great seed extract

## A Animal 9 Urine Metabolites

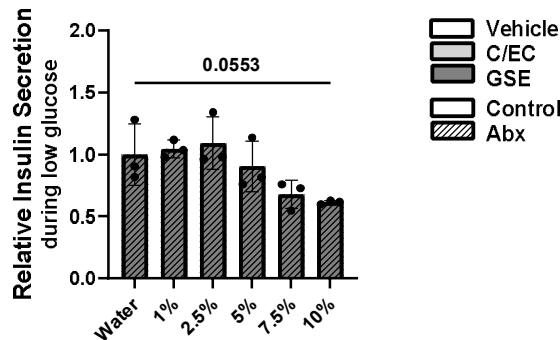

## B Animal 12 Urine Metabolites

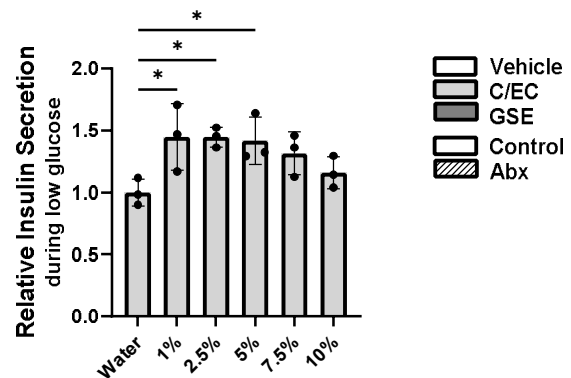

## C Animal 23 Urine Metabolites

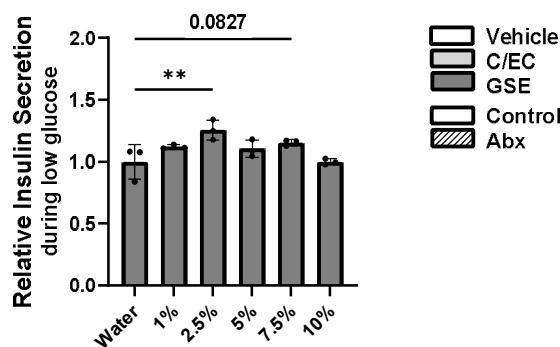

## D Animal 24 Urine Metabolites

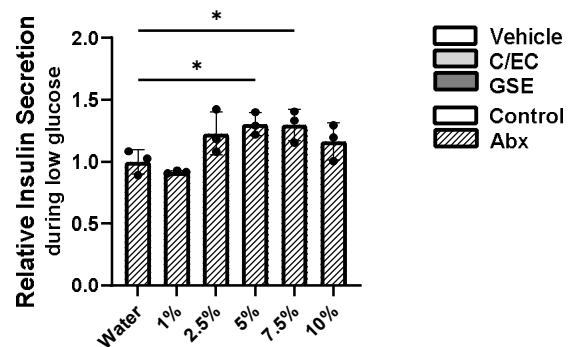

Supplementary Figure S7: Individual-level Dose Responses of Metabolites from Individual Animals on  $\beta$ -cell Insulin Secretion under Unstimulated Conditions.

Low glucose insulin secretion results of INS-1 832/13  $\beta$ -cells cultured with metabolites of 4 individual rats from Figure 1 showing significant dose response effects. Dose responsive rats were fed GSE with Abx (A), C/EC (B), GSE (C), and Vehicle with Abx (D). Metabolites were diluted in media at 1%-10% final concentrations. Values are reported relative to the control  $\beta$ -cells cultured with water. Data represent the average of 3  $\beta$ -cell culture triplicates for each animal. \*Represent 1-way ANOVA with Dunnett's *post hoc* test results of significant dose effects compared to the water control. \* $p < 0.05$ , \*\* $p < 0.01$ , or not significant (ns). Abbreviations: V: vehicle, Abx: antibiotics, C/EC: catechin/epicatechin, GSE: great seed extract



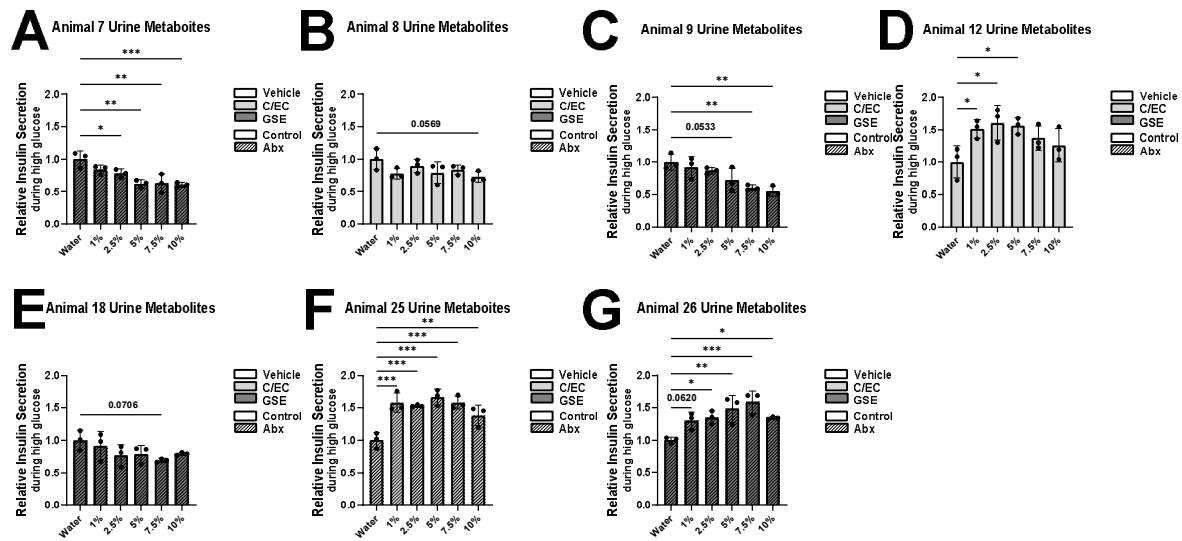

*Supplementary Figure S8: Dose Responses of Metabolites from Individual Animals on Insulin Secretion under Stimulated Condition*

High glucose insulin secretion results of INS-1 832/13  $\beta$ -cells cultured with metabolites of 7 individual rats from Figure 2 showing significant dose response effects. Dose responsive rats were fed GSE with Abx (A,C,E,G), C/EC (B,D), and C/EC with Abx (F). Metabolites were diluted in media at 1%-10% final concentrations. Values are reported relative to the control  $\beta$ -cells cultured with water. Data represent the average of 3  $\beta$ -cell culture triplicates for each animal. \*Represent 1-way ANOVA with Dunnett's *post hoc* test results of significant dose effects compared to the water control. \* $p < 0.05$ , \*\* $p < 0.01$ , \*\*\* $p < 0.001$  or not significant (ns). Abbreviations: V: vehicle, Abx: antibiotics, C/EC: catechin/epicatechin, GSE: great seed extract

## A Animal 7 Urine Metaboites

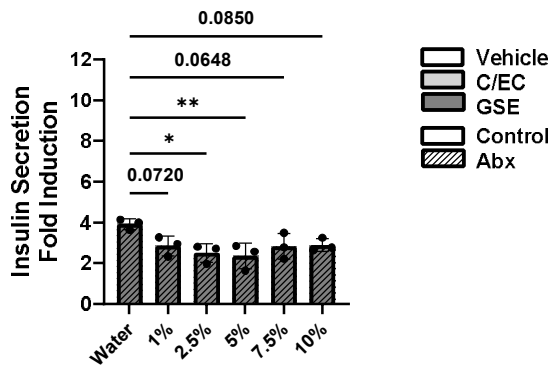

## B Animal 14 Urine Metabolites

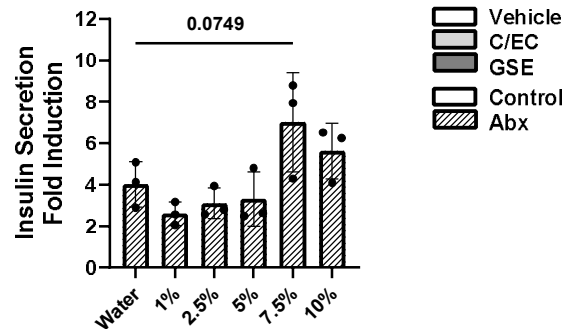

## C Animal 23 Urine Metabolites

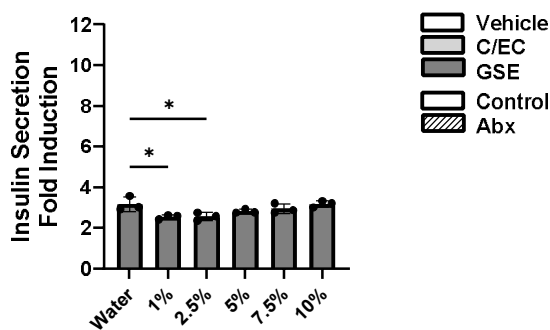

## D Animal 25 Urine Metabolites

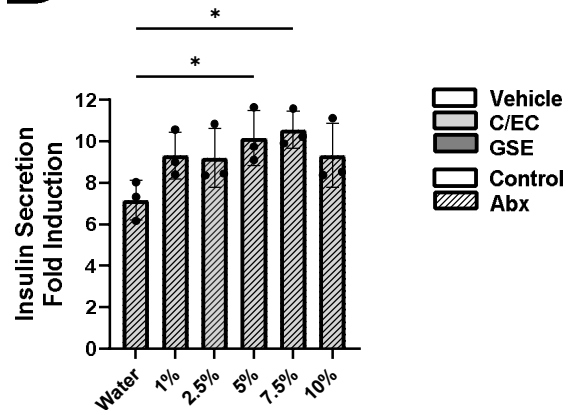

### Supplementary Figure S9: Dose Responses of Metabolites from Individual Animals on Insulin Secretion Fold Induction

Insulin secretion fold induction results of INS-1 832/13  $\beta$ -cells cultured with metabolites of 4 individual rats from Figure 3 showing significant dose response effects. Dose responsive rats were fed GSE with Abx (A), Vehicle with Abx (B), GSE (C), and C/EC with Abx (D).

Metabolites were diluted in media at 1%-10% final concentrations. Values are reported relative to the control  $\beta$ -cells cultured with water. Data represent the average of 3  $\beta$ -cell culture triplicates for each animal. \*Represent 1-way ANOVA with Dunnett's *post hoc* test results of significant dose effects compared to the water control. \* $p < 0.05$ , \*\* $p < 0.01$ , or not significant (ns).

Abbreviations: V: vehicle, Abx: antibiotics, C/EC: catechin/epicatechin, GSE: great seed extract

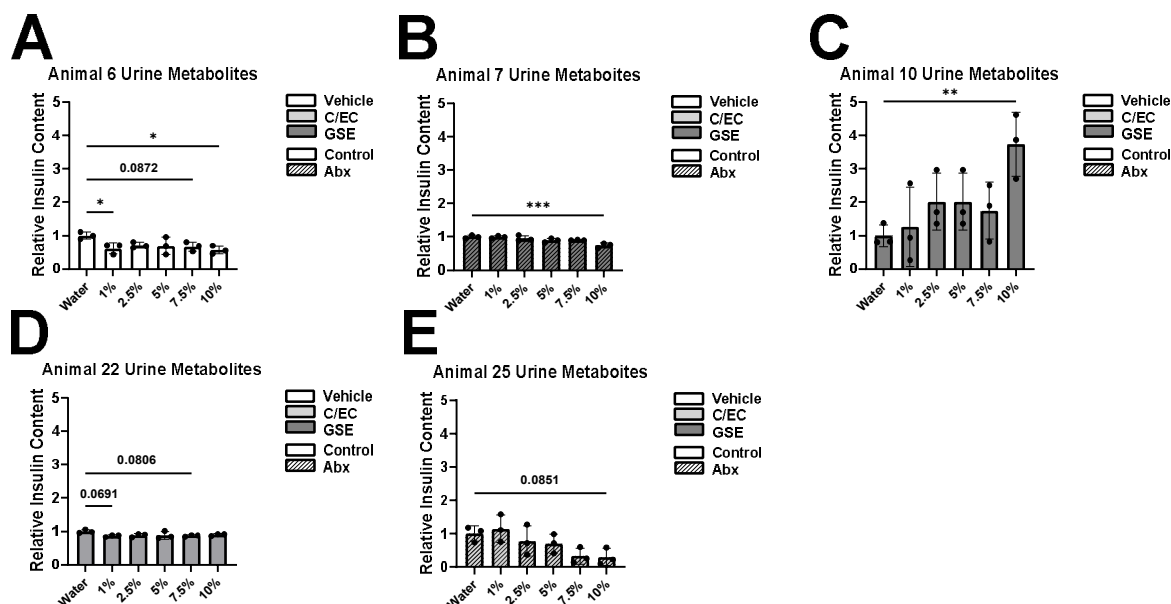

*Supplementary Figure S10: Dose Responses of Metabolites from Individual Animals on Insulin Content*

Insulin content results of INS-1 832/13  $\beta$ -cells cultured with metabolites of 5 individual rats from Figure 4 showing significant dose response effects. Dose responsive rats were fed the Vehicle (A), GSE with Abx (B), GSE (C), (D), and C/EC with Abx (E). Values are reported relative to the control  $\beta$ -cells cultured with water. Data represent the average of 3  $\beta$ -cell culture triplicates for each animal. \*Represent 1-way ANOVA with Dunnett's *post hoc* test results of significant dose effects compared to the water control. \* $p < 0.05$ , \*\* $p < 0.01$ , \*\*\* $p < 0.001$  or not significant (ns). Abbreviations: V: vehicle, Abx: antibiotics, C/EC: catechin/epicatechin, GSE: great seed extract

**Supplementary Table S1.** Composition of Vitaflavan®<sup>1</sup> grape seed extract

|                               |      |
|-------------------------------|------|
| Total Polyphenol Content      | >96% |
| Flavanol monomers             | <25% |
| Flavanol Dimers + Trimers     | >30% |
| Total Procyanidins Content    | >75% |
| Procyanidins Content (Porter) | 70   |

<sup>1</sup>Composition data provided by DRT Nutraceutics, Dax, France
